# Supplementary material for: A gene-activating skin substitute comprising PLLA/POSS nanofibers and plasmid DNA encoding ANG and bFGF promotesin vivorevascularization and epidermalization
Source: Royal Society of Chemistry journal article supplement (doi:10.1039/c8tb02006j), 2018-01-01
Supplement: c8tb02006j1.pdf [file c8tb02006j1.pdf]

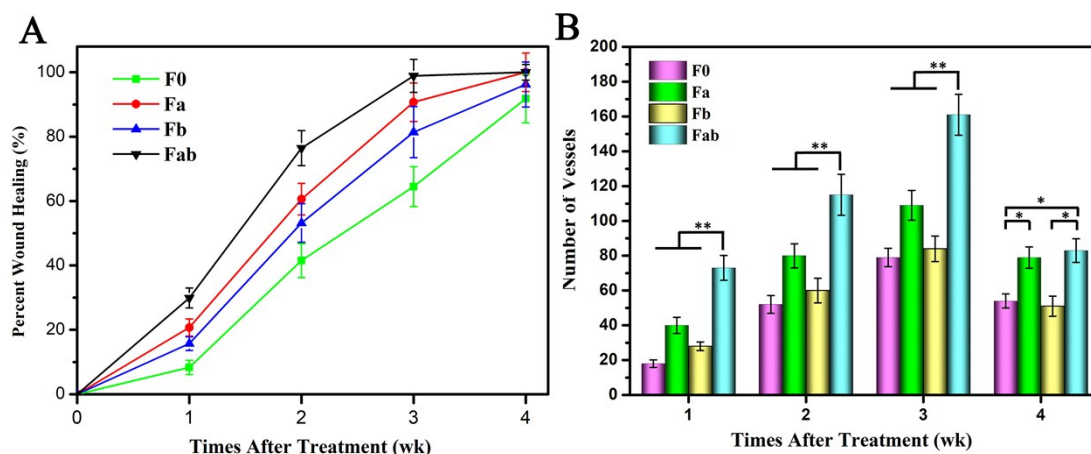

Fig. S1 (A) Percent wound healing at different time points after treatment (n = 10). (B) Number of blood vessels counted at 1, 2, 3 and 4 weeks after implantation of F0, Fa, Fb and Fab nanofiber mats. n = 10, \* p < 0.05 and \*\* p < 0.01.

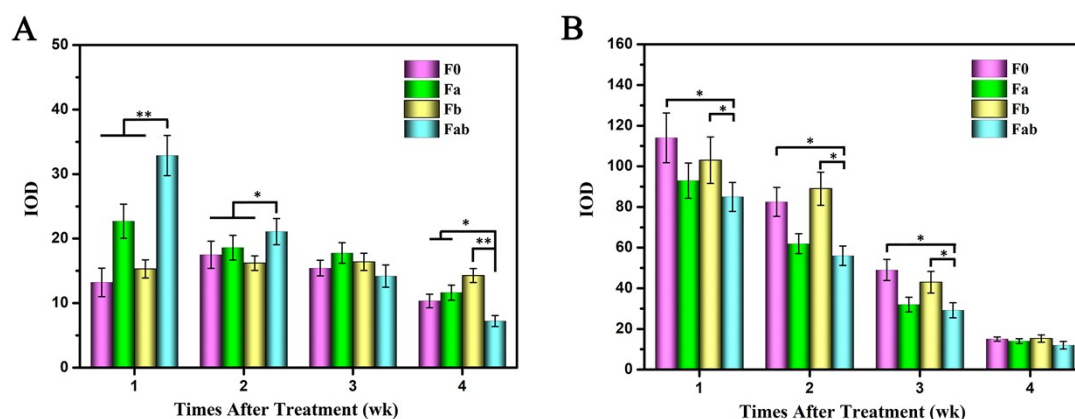

Fig. S2 Integrated optical density (IOD) of collagen (A) and inflammation (B) were quantified on immunohistochemistry slices (1 mm<sup>2</sup>) at 1, 2, 3 and 4 weeks after implantation of Fa, Fb and Fab nanofiber mats and compared with F0 nanofiber mats. n = 10, \* p < 0.05 and \*\* p < 0.01.
